# Supplementary material for: Homochiral one-dimensional ABX3 lead halide perovskites with high-Tc quadratic nonlinear optical and dielectric switchings
Source: Royal Society of Chemistry journal article supplement (doi:10.1039/d1qm00223f), 2021-01-01
Supplement: d1qm00223f1.pdf [file d1qm00223f1.pdf]

## Supporting information

### Homochiral One-Dimensional $ABX_3$ Lead Halide Perovskites with High- $T_c$ Quadratic Nonlinear Optical and Dielectric Switchings†

Hang Peng<sup>+</sup>, Yu-Hua Liu<sup>+</sup>, Xue-Qin Huang<sup>+</sup>, Qin Liu, Zi-Hong Yu, Zhong-Xia Wang\* and Wei-Qiang Liao\*

Ordered Matter Science Research Center, Nanchang University, Nanchang, 330031, P.R. China.

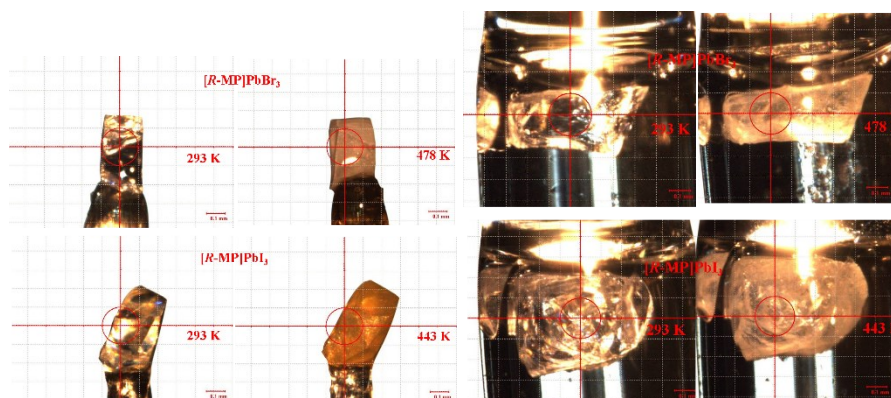

**Fig. S1** The change of crystal morphology at different measured temperatures under the flow of warm nitrogen (left) and in a sealed melting point tube (right).

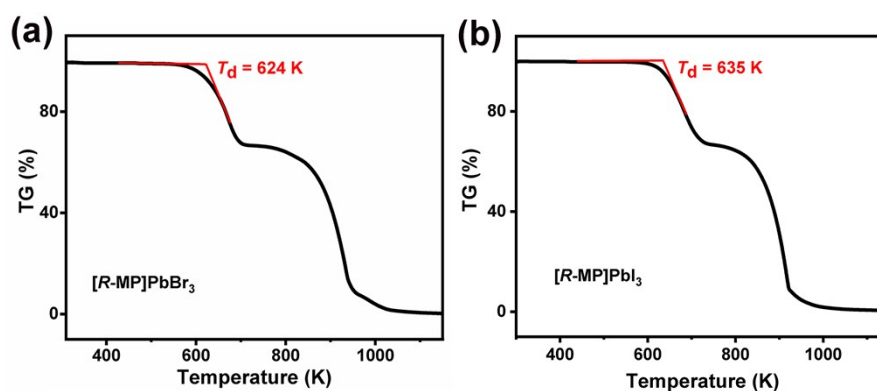

**Fig. S2** Thermogravimetric analysis (TGA) curves of  $[R-MP]PbBr_3$  (a) and  $[R-MP]PbI_3$  (b).

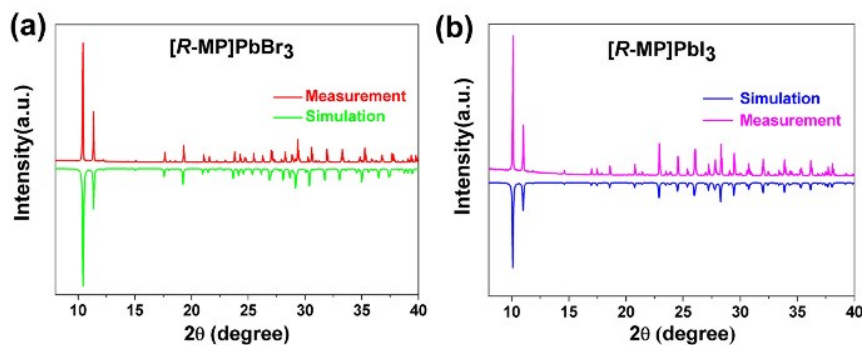

**Fig. S3** The measured and simulated PXRD patterns for  $[R-MP]PbBr_3$  (a) and  $[R-MP]PbI_3$  (b) at 293 K.

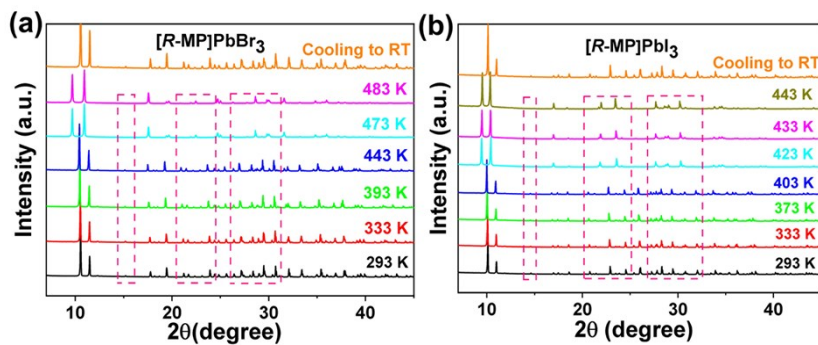

**Fig. S4** Variable-temperature PXRD patterns for  $[R-MP]PbBr_3$  (a) and  $[R-MP]PbI_3$  (b).

**Table S1.** Crystal data and structure refinements for  $[R-MP]PbBr_3$  and  $[R-MP]PbI_3$  at 293 K.

| Formula                | $[C_6H_{14}N]PbBr_3$ | $[C_6H_{14}N]PbI_3$ |
|------------------------|----------------------|---------------------|
| Temperature            | 293 K                | 293 K               |
| Weight                 | 547.10               | 688.08              |
| Crystal system         | Orthorhombic         | Orthorhombic        |
| Space group            | $P2_12_12_1$         | $P2_12_12_1$        |
| $a/\text{\AA}$         | 8.1775(3)            | 8.4004(4)           |
| $b/\text{\AA}$         | 10.0778(5)           | 10.4483(5)          |
| $c/\text{\AA}$         | 15.5422(6)           | 16.0931(7)          |
| $\alpha/\text{deg}$    | 90                   | 90                  |
| $\beta/\text{deg}$     | 90                   | 90                  |
| $\gamma/\text{deg}$    | 90                   | 90                  |
| Volume/ $\text{\AA}^3$ | 1280.85(9)           | 1412.51(11)         |
| $D_c/\text{g cm}^{-3}$ | 2.837                | 3.236               |
| $Z$                    | 4                    | 4                   |
| $R1 [I > 2\sigma(I)]$  | 0.0401               | 0.0432              |
| $wR2 [I > 2\sigma(I)]$ | 0.0789               | 0.1080              |
| GOF                    | 1.003                | 1.005               |

**Table S2.** Selected Pb–Br bond lengths [Å] and Br–Pb–Br bond angles [°] for [R-MP]PbBr<sub>3</sub> at 293 K.

| Bond lengths [Å]      |            |                           | Bond angles [°] |                                          |             |
|-----------------------|------------|---------------------------|-----------------|------------------------------------------|-------------|
| Pb1–Br1               | 2.9042(15) | Br1 <sup>i</sup> –Pb1–Br3 | 84.888(40)      | Br1 <sup>i</sup> –Pb1–Br3 <sup>ii</sup>  | 106.313(36) |
| Pb1–Br2               | 2.9443(14) | Br1–Pb1–Br2               | 87.02(4)        | Br1 <sup>i</sup> –Pb1–Br2 <sup>ii</sup>  | 75.150(38)  |
| Pb1–Br3               | 2.8465(15) | Br1–Pb1–Br2 <sup>ii</sup> | 98.552(41)      | Br2–Pb1–Br3                              | 90.34(4)    |
| Pb1–Br1 <sup>i</sup>  | 3.2692(15) | Br1–Pb1–Br3               | 87.62(4)        | Br2–Pb1–Br3 <sup>ii</sup>                | 79.984(38)  |
| Pb1–Br2 <sup>i</sup>  | 3.3335(15) | Br1–Pb1–Br3 <sup>ii</sup> | 81.916(39)      | Br2 <sup>ii</sup> –Pb1–Br3               | 82.276(38)  |
| Pb1–Br3 <sup>ii</sup> | 3.3857(14) | Br1 <sup>i</sup> –Pb1–Br2 | 98.362(41)      | Br2 <sup>ii</sup> –Pb1–Br3 <sup>ii</sup> | 108.295(36) |

Symmetry code(s): (i)  $-1/2+x, 3/2-y, 1-z$ ; (ii)  $1/2+x, 3/2-y, 1-z$ .

**Table S3.** Selected Pb–I bond lengths [Å] and I–Pb–I bond angles [°] for [R-MP]PbI<sub>3</sub> at 293 K.

| Bond lengths [Å]     |            |                         | Bond angles [°] |                                        |             |
|----------------------|------------|-------------------------|-----------------|----------------------------------------|-------------|
| Pb1–I1               | 3.16(15)   | I1 <sup>i</sup> –Pb1–I3 | 78.692(37)      | I1 <sup>i</sup> –Pb1–I3 <sup>ii</sup>  | 94.825(40)  |
| Pb1–I2               | 3.0404(15) | I1–Pb1–I2               | 92.14(4)        | I1 <sup>i</sup> –Pb1–I2 <sup>ii</sup>  | 102.567(37) |
| Pb1–I3               | 3.4053(15) | I1–Pb1–I2 <sup>ii</sup> | 81.131(37)      | I2–Pb1–I3                              | 85.96(3)    |
| Pb1–I1 <sup>i</sup>  | 3.4306(16) | I1–Pb1–I3               | 98.42(4)        | I2–Pb1–I3 <sup>ii</sup>                | 88.49(4)    |
| Pb1–I2 <sup>ii</sup> | 3.5291(15) | I1–Pb1–I3 <sup>ii</sup> | 87.77(4)        | I2 <sup>ii</sup> –Pb1–I3               | 103.044(36) |
| Pb1–I3 <sup>ii</sup> | 3.0888(14) | I1 <sup>i</sup> –Pb1–I2 | 84.510(38)      | I2 <sup>ii</sup> –Pb1–I3 <sup>ii</sup> | 83.112(37)  |

Symmetry code(s): (i)  $1/2+x, -1/2-y, -z$ ; (ii)  $-1/2+x, -1/2-y, -z$ .
